# Supplementary material for: Poly(acenaphtho[1,2-b]thieno[3,4-e]pyrazine): a new low band gap conjugated polymer
Source: Royal Society of Chemistry journal article supplement (doi:10.1039/b713126g), 2008-01-01
Supplement: b713126g.pdf [file b713126g.pdf]

## SUPPORTING INFORMATION

### Poly(acenaphtho[1,2-*b*]thieno[3,4-*e*]pyrazine): A New Low Band Gap Conjugated Polymer

Jon P. Nietfeld, Christopher L. Heth, and Seth C. Rasmussen\*

*Department of Chemistry and Molecular Biology, North Dakota State University, Fargo, ND 58105, USA. Fax: 1-701-231-8747; Tel: 1-701-231-8831; E-mail: seth.rasmussen@ndsu.edu*

#### Table of Contents:

|                                                                                                  |    |
|--------------------------------------------------------------------------------------------------|----|
| I. Synthesis and characterization data for monomer <b>10</b> .....                               | S1 |
| II. <b>Figure S1.</b> <sup>1</sup> H NMR spectrum of monomer <b>10</b> .....                     | S2 |
| III. <b>Figure S2.</b> <sup>13</sup> C NMR spectrum of monomer <b>10</b> .....                   | S2 |
| IV. Electrochemistry and Electropolymerizations.....                                             | S3 |
| V. <b>Figure S3.</b> Expanded CV of pATP.....                                                    | S3 |
| VI. MO and ZINDO Calculations.....                                                               | S4 |
| VII. <b>Figure S4.</b> MOs of monomer <b>10</b> .....                                            | S4 |
| VIII. <b>Table S1.</b> Mulliken atomic charges for the radical cation of monomer <b>10</b> ..... | S5 |
| IX. <b>Table S2.</b> Calculated HOMO-LUMO energy gaps of (ATP) <sub>n</sub> oligomers .....      | S5 |
| X. <b>Figure S5.</b> Plot of 1/n vs. HOMO-LUMO energy.....                                       | S6 |
| XI. Optical Spectroscopy and Spectroelectrochemistry.....                                        | S6 |
| XII. References.....                                                                             | S7 |

**General.** 3,4-Diaminothiophene (**8**)<sup>1</sup> was prepared from the reduction of 2,5-dibromo-3,4-dinitrothiophene<sup>2</sup> as previously reported. Unless otherwise specified, all reactions were carried out under nitrogen atmosphere with reagent grade materials. Chromatographic separations were performed using standard column methods with silica gel (230-400mesh). The <sup>1</sup>H and <sup>13</sup>C NMR spectra were carried out on a 400 MHz spectrometer in CDCl<sub>3</sub>. All NMR data was referenced to the chloroform signal and peak multiplicity was reported as follows: s = singlet, d = doublet, t = triplet.

**Acenaphtho[1,2-*b*]thieno[5,4-*e*]pyrazine (**10**).** Diaminothiophene **8** (1.3 g, 11.4 mmol) was dissolved in 80mL of absolute ethanol. 1,2-Acenaphthenequinone (2.5 g, 13.7mmol) was then added and the solution heated at reflux for 3 hours. The mixture was then cooled to room temperature, diluted with 200 mL of water, and extracted with dichloromethane. The combined organic layers were dried with anhydrous Na<sub>2</sub>SO<sub>4</sub> and the solvent removed by rotary evaporation. The resulting solid was then dissolved in CH<sub>2</sub>Cl<sub>2</sub>,

run through a 5 cm silica plug, and concentrated to give a yellow solid. A final recrystallization from methanol gave yellow needles of **10** (1.6 g, 54%). mp: ~150 °C (dec);  $^1\text{H}$  NMR:  $\delta$  8.25 (dd,  $J = 7.2, 0.4$  Hz, 2H), 8.03 (dd,  $J = 8.4, 0.4$  Hz) 2H), 7.98 (s, 2H), 7.77 (dd,  $J = 8.4, 7.2$  Hz, 2H);  $^{13}\text{C}$  NMR:  $\delta$  154.5, 142.1, 138.5, 131.7, 130.4, 129.3, 128.9, 121.1, 117.8.

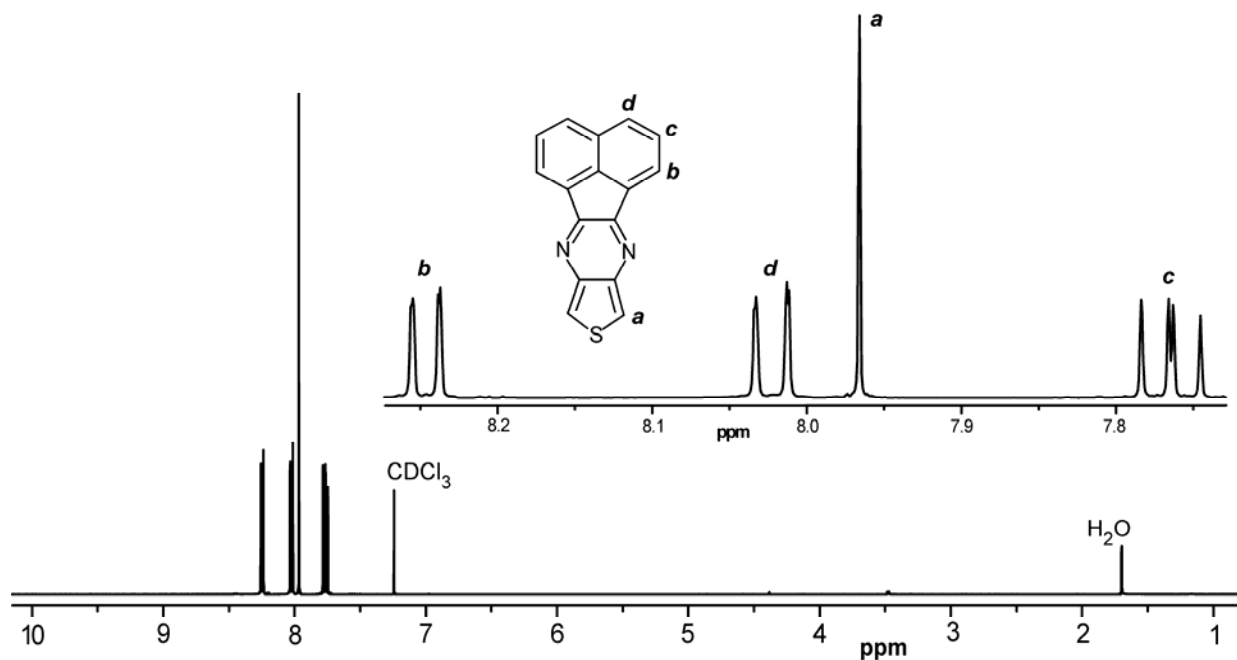

**Figure S1.**  $^1\text{H}$  NMR spectrum of monomer **10**

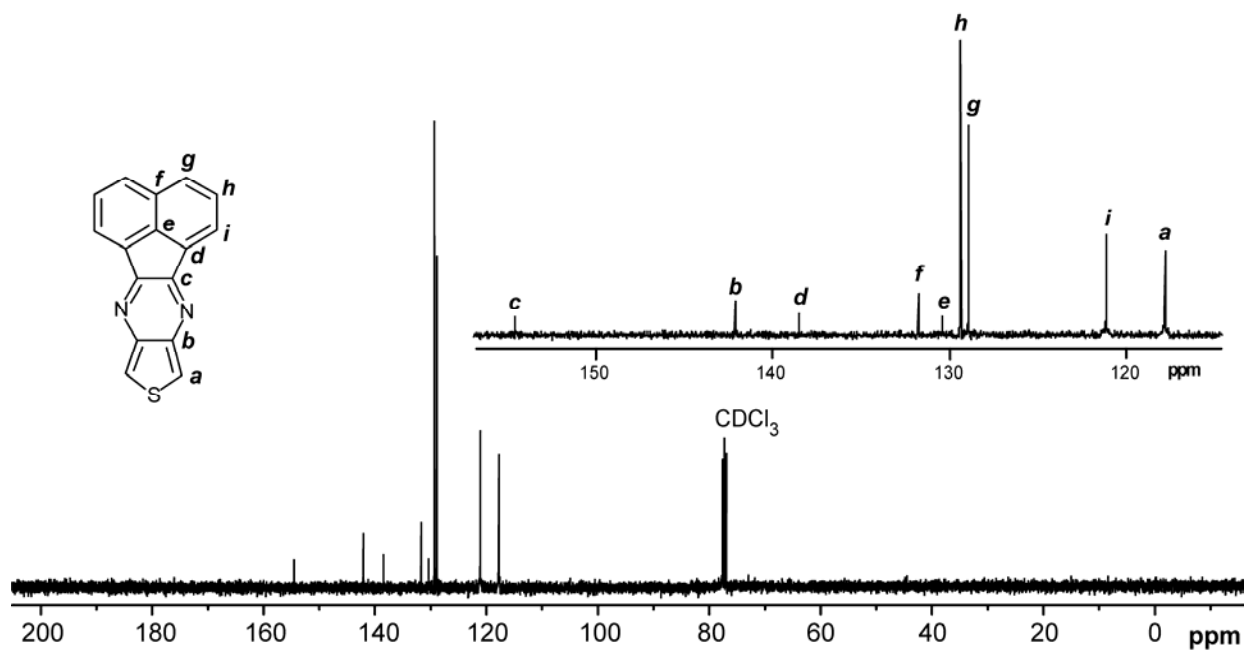

**Figure S2.**  $^{13}\text{C}$  NMR spectrum of monomer **10**

**Electrochemistry and Electropolymerizations.** Electropolymerization experiments were carried out in a three-electrode cell consisting of a working electrode (either a platinum disc or an indium tin oxide (ITO) coated slide), a platinum wire auxiliary electrode, and a silver wire quasi-reference electrode. Solutions consisted of monomer **10** (0.06 M) dissolved in anhydrous  $\text{CH}_2\text{Cl}_2$  with 0.10 M tetrabutylammonium hexafluorophosphate ( $\text{TBAPF}_6$ ) as the supporting electrolyte. The solutions were deoxygenated by sparging with argon prior to each scan and blanketed with argon during the polymerizations. The platinum disc working electrode was polished with 0.05 mm alumina and washed well with deionized water and dry  $\text{CH}_2\text{Cl}_2$  prior to each film growth. The polymer films were grown at a constant potential of 1.75 V. The resulting polymer films were then conditioned by cycling several times. The polymer-coated electrode was then removed, washed with dry  $\text{CH}_2\text{Cl}_2$  and placed in a cell with a fresh electrolyte solution. Cyclic voltammetry (CV) were carried out in the cell described above at a sweep rate of 100 mV/s. The solutions were argon sparged and blanketed as described above. Potentials were referenced to the ferrocene redox couple (45 mV vs.  $\text{Ag}/\text{Ag}^+$ ).

Differential pulse voltammetry (DPV) was performed on electropolymerized films of pATP for additional determination of the redox onsets. Measurements were of the pATP films on a platinum disc working electrode. Conditions and cell configuration were the same as for the CV measurements above, with the exception that the sweep rate was reduced to 20 mV/s. Both positive and negative sweeps were measured in order to determine accurate onsets for both the oxidation and reduction of the polymer film.

Analysis of monomer **10** by CV was carried out in the cell described above, substituting a  $\text{Ag}/\text{Ag}^+$  reference electrode (0.251 V vs. SCE)<sup>3</sup> for the silver wire quasi-reference. Solutions consisted of monomer (0.06 M) dissolved in spectral grade  $\text{CH}_3\text{CN}$  with 0.10 M  $\text{TBAPF}_6$  as the supporting electrolyte. All scans were performed at a sweep rate of 100 mV/s and solutions were argon sparged and blanketed as described above.

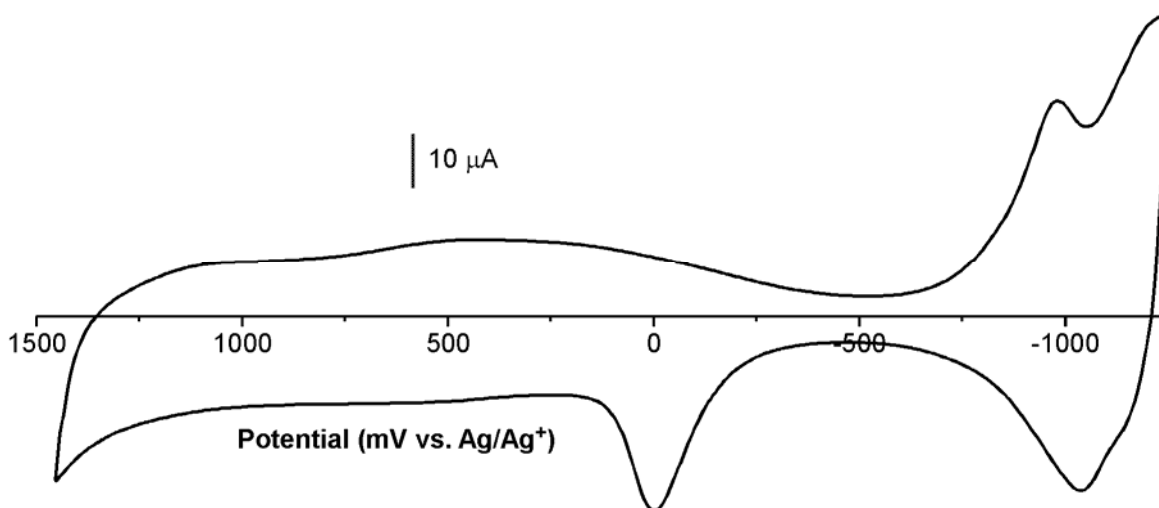

**Figure S3.** Expanded CV of pATP

**MO and ZINDO Calculations.** All calculations were performed using the Gaussian03 software package. Optimized geometries were calculated unrestrained using HF methods and the 6-31G\* basis set. Single point energy calculations were then performed using the same methods as the geometry optimization, followed by ZINDO calculations to determine transition energies. For neutral species, a single point energy calculation using methods matching the geometry optimization followed. Mulliken spin densities for radical species were determined from a single point energy calculation at the neutral optimized geometry using DFT methods, a 6-31G\* basis set, and a B3LYP correlation functional. Molecular orbital diagrams were generated using GaussView 3.09 from the checkpoint file generated during the single point energy calculations. In all calculations, very tight SCF convergence criteria were used and molecular symmetry was ignored. When stepwise calculations were performed, the trailing step used only the output geometry from the previous step and did not glean a guess from a previous checkpoint file.

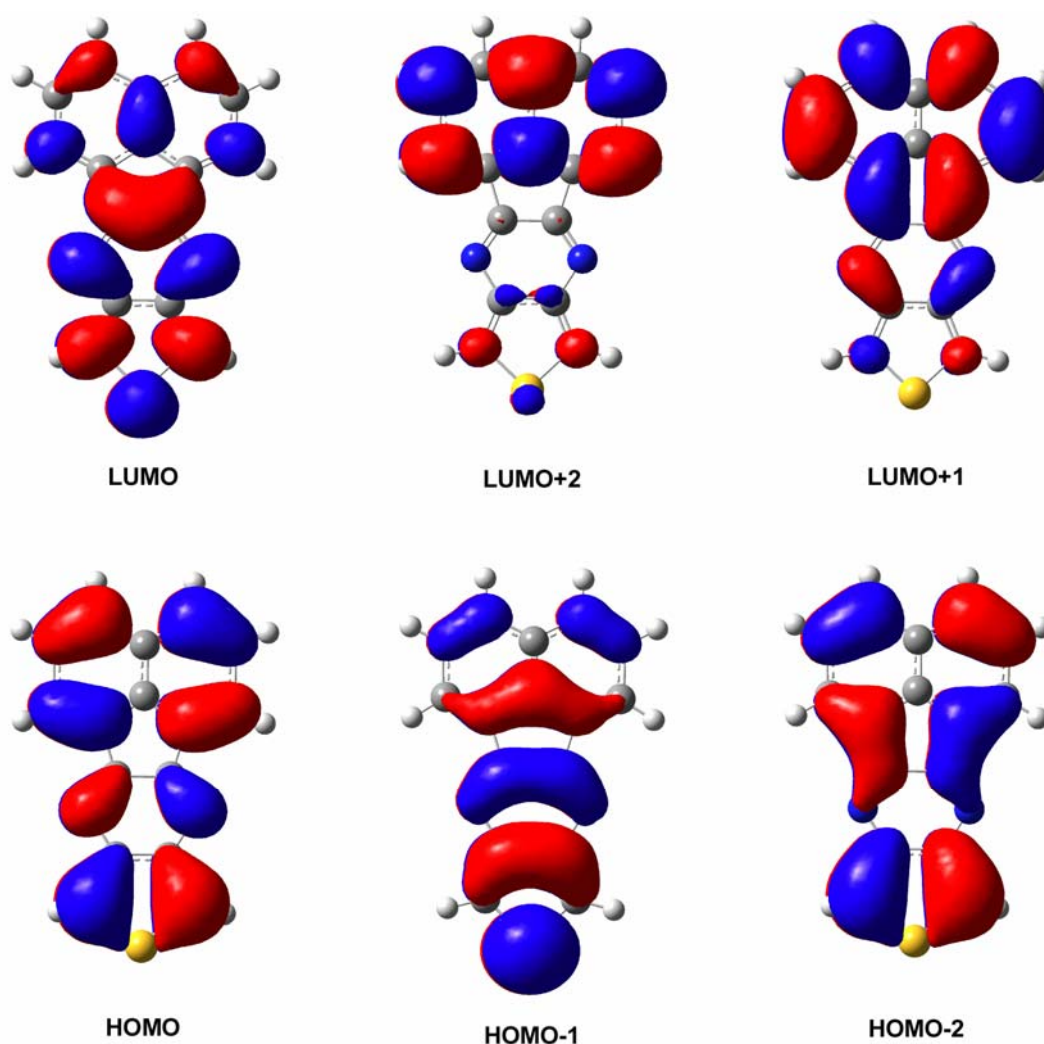

**Figure S4.** MOs of monomer 10

**Table S1.** Mulliken atomic charges for the radical cation of monomer **10**

| Atom | Atomic Charge | Atom | Atomic Charge |
|------|---------------|------|---------------|
| C1   | 0.270927      | C15  | -0.049852     |
| C2   | -0.044499     | C16  | -0.007459     |
| C3   | -0.044517     | H17  | -0.002903     |
| C4   | 0.270884      | C18  | 0.149767      |
| S5   | -0.044427     | H19  | -0.000453     |
| H6   | -0.012052     | H20  | -0.006053     |
| H7   | -0.012052     | C21  | 0.099461      |
| N8   | 0.103935      | C22  | 0.149796      |
| N9   | 0.103942      | 23 C | 0.055183      |
| C10  | -0.042094     | 24 C | -0.007473     |
| C11  | -0.042079     | 25 H | -0.006053     |
| C12  | 0.099453      | 26 H | -0.002906     |
| C13  | -0.033161     | 27 H | -0.000453     |
| C14  | 0.055140      |      |               |

**Table S2.** Calculated HOMO-LUMO energy gaps of (ATP)<sub>n</sub> oligomers

| n | HOMO-LUMO |      | n | HOMO-LUMO |      |
|---|-----------|------|---|-----------|------|
|   | nm        | eV   |   | nm        | eV   |
| 1 | 327       | 3.79 | 4 | 795       | 1.56 |
| 2 | 560       | 2.21 | 8 | 1017      | 1.22 |
| 3 | 692       | 1.79 |   |           |      |

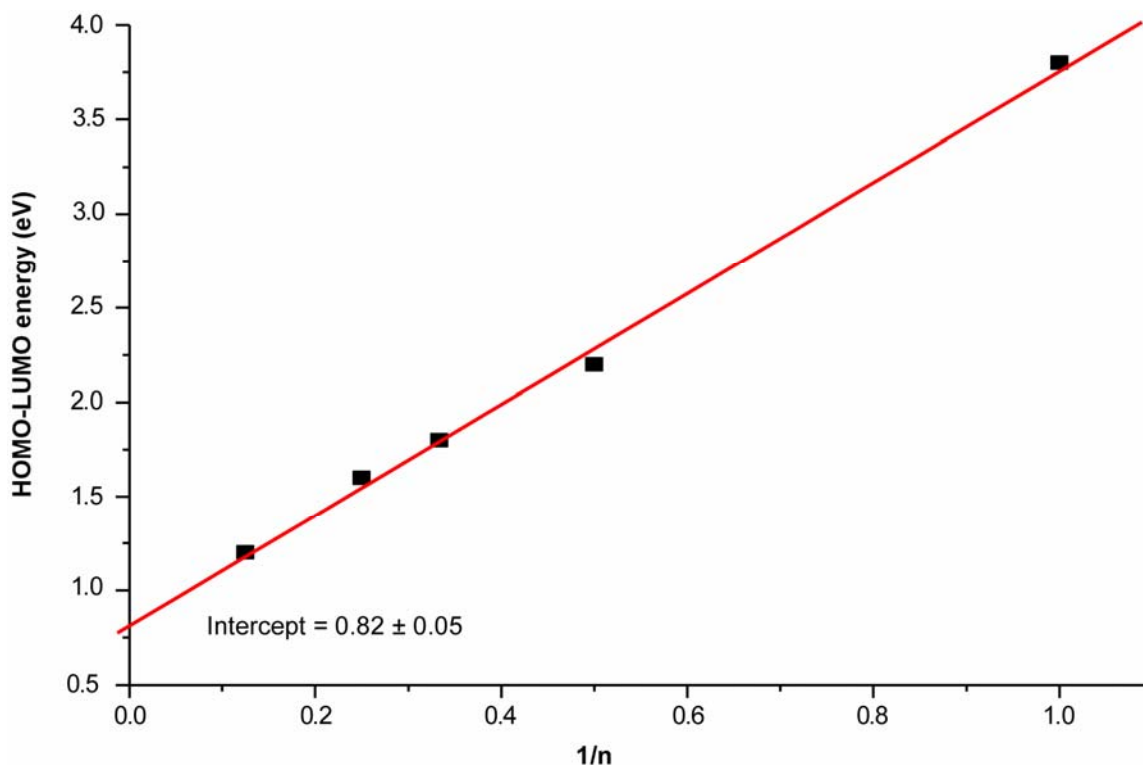

**Figure S5.** Plot of  $1/n$  vs. HOMO-LUMO energy

**Table S3.** ZINDO results for the octamer (ATP)<sub>8</sub>

| Transition | eV   | nm   | f    |
|------------|------|------|------|
| 1          | 1.22 | 1017 | 1.73 |
| 2          | 1.90 | 654  | 0.15 |
| 3          | 2.45 | 507  | 0.25 |
| 4          | 2.77 | 448  | 0.38 |
| 5          | 2.82 | 439  | 0.73 |
| 6          | 2.94 | 422  | 0.27 |

**Optical Spectroscopy and Spectroelectrochemistry.** Visible-NIR spectroscopy was performed on a dual beam scanning UV-vis-NIR spectrophotometer using polymer samples grown on ITO slides as stated above. After polymerization, the polymer-coated electrode was held at a reducing potential to ensure dedoping of the film. The film was then washed with CH<sub>2</sub>Cl<sub>2</sub> and dried. Spectroscopy was conducted on the films with reference to blank ITO slides.

Spectroelectrochemistry was performed in a 1-cm quartz cuvette equipped with a polymer-coated ITO working electrode, a platinum wire auxiliary electrode, and a silver wire quasi-reference electrode. The

cell solution consisted of 0.1 M TBAPF<sub>6</sub> in dry CH<sub>2</sub>Cl<sub>2</sub>. The ITO slide/polymer film was held at the desired potential for 120 seconds before measurement of the spectrum.

#### REFERENCES

1. D. D. Kenning, K. A. Mitchell, T. R. Calhoun, M. R. Funfar, D. J. Sattler, and S. C. Rasmussen, *J. Org. Chem.*, 2002, **67**, 9073.
2. L. Wen and S. C. Rasmussen, *J. Chem. Crystallogr.*, 2007, **37**, 387.
3. R. C. Larson, R. T. Iwamoto, and R. N. Adams, *Anal. Chim. Acta*, 1961, **25**, 371.
